# Supplementary material for: Gut microbiota mediates trafficking of intestinal T cells to the brain to exacerbate neuroinflammation after ischemic stroke
Source: Research Square preprint supplement (doi:10.21203/rs.3.rs-6952560/v1), 2025-06-29
Supplement: Supplementary file 1 [file 3c85a6e13b2af177dc36e8f9.xlsx]

## Sheet: Sheet3
Table 1 IMC antibody panel on huamn FFPE sections.
	Antibody	Metal	Clone	Company	Cat	Titration
1	CD14	141Pr	BLR187J	abcam	ab314062	100
2	GFAP	144Nd	EPR1034Y	abcam	ab218309	100
3	CD4	145Nd	D7D27	CST	23140SF	50
4	CD8a	146Nd	C8/144B	biolegend	372902	50
5	CD31	149Sm	89C2	CST	85873SF	100
6	S100β	150Nd	4C4.9	abcam	ab212816	100
7	HIF1α	151Eu	EP1215Y	abcam	ab210073	100
8	CD45	152Sm	RM1007	abcam	ab282747	50
9	CD7	153Eu	EPR4242	abcam	ab230834	100
10	CD163	154Sm	EPR19518	abcam	ab213612	50
11	MAP2	158Gd	EPR19691	abcam	ab236033	100
12	CD68	159Tb	D4B9C	CST	26042SF	100
13	CD11b	160Gd	ICRF44	biolegend	301302	100
14	CD20	161Dy	ARC0331	ABclonal	A4893NFB	100
15	CD11c	162Dy	EP1347Y	abcam	ab216655	100
16	IbaI	163Dy	EPR16589	abcam	ab221790	100
17	Granzyme B	164Dy	EPR20129-217	abcam	ab219803	100
18	PD-1	165Ho	EH33	CST	60847SF	50
19	P2Y12	167Er	EPR26298-93	abcam	ab300141	100
20	HLA-DR	168Er	TAL 1B5	NOVUS	NB600-989	100
21	CD206	169Tm	EPR22489-7	abcam	ab254471	100
22	CD3	170Er	D7A6E	CST	24581SF	50
23	Olig2	172Yb	EPR2673	abcam	ab220796	100
24	CD45RO	173Yb	UCHL1	biolegend	304239	100
25	DNA	191/193Ir	/	Fluidigm	/	1000
26	αSMA	194Pt	EPR18403	abcam	ab250775	100
27	Vimentin	198Pt	D21H3	CST	46173SF	500
Table 2 Spectral flow cytometry Antibody panel on mice brain.
	Antigen	Format	Titration	Cat.NO	Company
1	Dead cells dye	Zombie NIR	1500	423105	Biolegend
2	F4/80	PE-Fire640	25	157319	Biolegend
3	CD45	PerCP-Cy5.5	25	103132	Biolegend
4	CXCR3	BV650	50	126531	Biolegend
5	CD105	APC	50	120413	Biolegend
6	O4	APC	50	130-118-978	Miltenyi Biotec
7	CD140a	APC	50	135907	Biolegend
8	CD25	PE-CY5	100	102010	Biolegend
9	CD62L	BV570	100	104433	Biolegend
10	CD44	BV711	100	103057	Biolegend
11	CD31	PE/Cy7	100	160213	Biolegend
12	PD-L1	PE	100	124307	Biolegend
13	CD8a	BV605	200	100743	Biolegend
14	CD4	eFluor™ 506	400	69-0042-82	invitrogen
15	PD-1	BV421	400	135217	Biolegend
16	CD3	FITC	400	100203	Biolegend
17	CD11b	SparkYG593	400	101281	Biolegend
Table 3 Spectral flow cytometry Antibody panel on mice multiple organs.
	Antigen	Format	Titration	Cat.NO	Company
1	CD11b	BV711	100	101242	Biolegend
2	CD11c	BV785	100	117336	Biolegend
3	CD19	BV605	200	115540	Biolegend
4	CD25	APC	100	102012	Biolegend
5	CD3	Pacific Blue	100	100214	Biolegend
6	CD4	eFluor™ 506	400	69-0042-82	invitrogen
7	CD45	PerCP-Cy5.5	25	103132	Biolegend
8	CD62L	BV570	100	104433	Biolegend
9	CD8a	Spark plus UV395	100	104011	Biolegend
12	NK1.1	APC/Fire810	200	156519	Biolegend
13	PD-1	BV421	100	135217	Biolegend
14	Dead cells dye	Zombie NIR	1500	423105	Biolegend
Table 4 Spectral flow cytometry Antibody panel on Kaede mice samples.
	Antigen	Format	Titration	Cat.NO	Company
1	Dead cells dye	Zombie UV	1000	423107	Biolegend
2	CD3	Pacific Blue	100	100214	Biolegend
3	CD4	eFluor™ 506	400	69-0042-82	invitrogen
4	CD8a	Spark UV™ 387	100	100797	Biolegend
5	CD11b	SparkYG593	100	101281	Biolegend
6	CD11c	AF700	100	117319	Biolegend
7	CD19	BV605	200	115540	Biolegend
8	CD25	APC	100	102012	Biolegend
9	CD45	PerCP-Cy5.5	25	103132	Biolegend
10	F4/80	PE-Fire640	25	157319	Biolegend
11	PD-1	BV421	100	135217	Biolegend
12	Kaede Green	-	-
13	Kaede Red	-	-
Table 5 Flow cytometry Antibody panel on human whole blood.
	Antigen	Format	Titration	Cat.NO	Company
1	Zombie NIR	-	1500	423105	Biolegend
2	Fc Block	-	20	422301	Biolegend
3	CXCR3	PE-Fire 810	25	353760	Biolegend
4	CCR7	Spark NIR™ 685	25	353257	Biolegend
5	CXCR5	BV750	50	356941	Biolegend
6	CD45RA	PE-Dazzle594	50	304145	Biolegend
7	PD-1	BV421	50	329919	Biolegend
8	CCR6	BV480	50	566179	BD
9	CD127	BV711	50	351327	Biolegend
10	CD25	APC/Fire750	50	302641	Biolegend
11	CD161	BV510	50	339921	Biolegend
12	CD39	BV605	100	328235	Biolegend
13	CD38	BUV661	100	612970	Biolegend
14	CD7	Pacific Blue	100	343131	Biolegend
15	CD3	BV785	100	344841	Biolegend
16	CD8a	Spark Blue 550	100	344759	Biolegend
17	HLA-DR	PerCP	100	307627	Biolegend
18	CD45	APC-Fire 810	100	304075	Biolegend
19	ICOS	APC	100	313509	Biolegend
20	CD4	FITC	100	300505	Biolegend
21	FOXP3	PE	25	320007	Biolegend
22	Ki-67	BUV395	25	564071	BD
23	CTLA-4	BV650	50	369647	Biolegend
24	IFN-γ	PE-Cy7	200	506517	Biolegend
25	Granzyme B	PE-Cy5	50	372225	Biolegend
Table 6 Flow cytometry Antibody panel of PD-L1+ microglia purification from mice brain.
	Antigen	Format	Titration	Cat.NO	Company
1	Dead cells dye	Zombie NIR	1500	423105	Biolegend
2	CD45	PerCP-Cy5.5	25	103132	Biolegend
3	CD105	APC	50	120413	Biolegend
4	O4	APC	50	130-118-978	Miltenyi Biotec
5	CD140a	APC	50	135907	Biolegend
6	CD31	PE/Cy7	100	160213	Biolegend
7	PD-L1	PE	100	124307	Biolegend
8	CD11b	SparkYG593	400	101281	Biolegend
Table 7 Primer sequences of Quantitative real-time PCR for brain tissue.
	Antigen	sequence (3' to 5')
1	IL6-F	GACGTGGTATAAAGACAACTGGAAC
	IL6-R	AAGGATAGGGAAGTGCTGGATG
2	TGFβ-F	CTCCCGTGGCTTCTAGTGC
	TGFβ-R	GCCTTAGTTTGGACAGGATCTG
3	β-actin-F	GGCTGTATTCCCCTCCATCG
	β-actin-R	CCAGTTGGTAACAATGCCATGT
4	INOS-F	GTTCTCAGCCCAACAATACAAGA
	INOS-R	GTGGACGGGTCGATGTCAC
5	IL10-F	GCTCTTACTGACTGGCATGAG
	IL10-R	CGCAGCTCTAGGAGCATGTG
6	TNFα-F	CGTCGTAGCAAACCACCAAG
	TNFα-R	GGGGTCAGAGTAAAGGGGTC
7	Notch1-F	CCCTTGCTCTGCCTAACGC
	Notch1-R	GGAGTCCTGGCATCGTTGG
8	Notch2-F	ATGTGGACGAGTGTCTGTTGC
	Notch2-R	GGAAGCATAGGCACAGTCATC
